# Supplementary material for: Efficient adsorption/photodegradation of organic pollutants from aqueous systems using Cu2O nanocrystals as a novel integrated photocatalytic adsorbent
Source: Royal Society of Chemistry journal article supplement (doi:10.1039/c4ta02459a), 2014-07-31
Supplement: c4ta02459a1.pdf [file c4ta02459a1.pdf]

**Electronic Supplementary Information**

**Efficient adsorption/photodegradation of organic pollutants  
from aqueous systems using Cu<sub>2</sub>O nanocrystals as a novel  
integrated photocatalytic adsorbent**

Hong-Yu Jing,<sup>b</sup> Tao Wen,<sup>c</sup> Cong-Min Fan,<sup>a</sup> Gui-Qi Gao,<sup>a</sup> Sheng-Liang Zhong,<sup>b</sup> and  
An-Wu Xu<sup>\*,a</sup>

<sup>a</sup>Division of Nanomaterials and Chemistry, Hefei National Laboratory for Physical Sciences at Microscale Department, University of Science and Technology of China, Hefei 230026, P.R. China

<sup>b</sup>College of Chemistry and Chemical Engineering, Jiangxi Normal University, Nanchang 330022, P.R. China

<sup>c</sup>Institute of Plasma Physics, Chinese Academy of Sciences, Hefei 230031, P.R. China

\* Corresponding author. Phone: +86-551-63602346; Fax: +86-551-63602346; E-mail:

[anwuxu@ustc.edu.cn](mailto:anwuxu@ustc.edu.cn) (A.W. Xu).

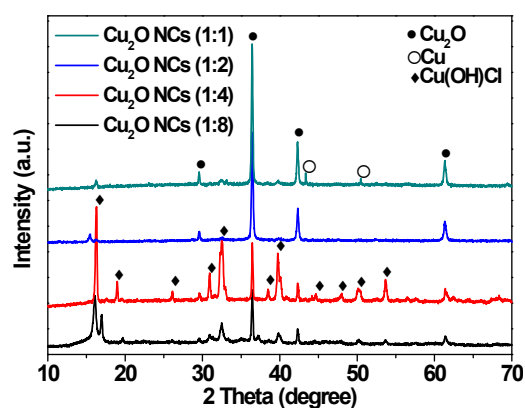

**Fig. S1** XRD patterns of the samples obtained with different molar ratios of Cu and  $\text{CuCl}_2$  reactants.

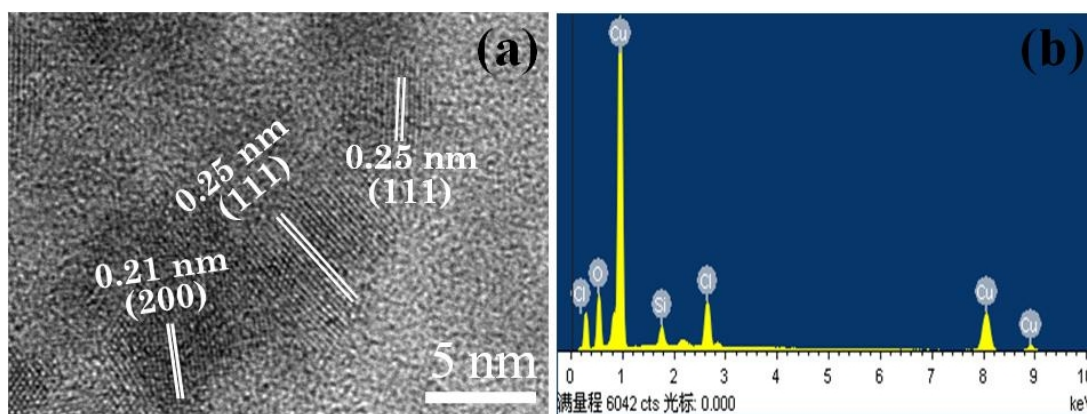

**Fig. S2.** HRTEM (a) image and EDS (b) spectrum of  $\text{Cu}_2\text{O}$  NCs.

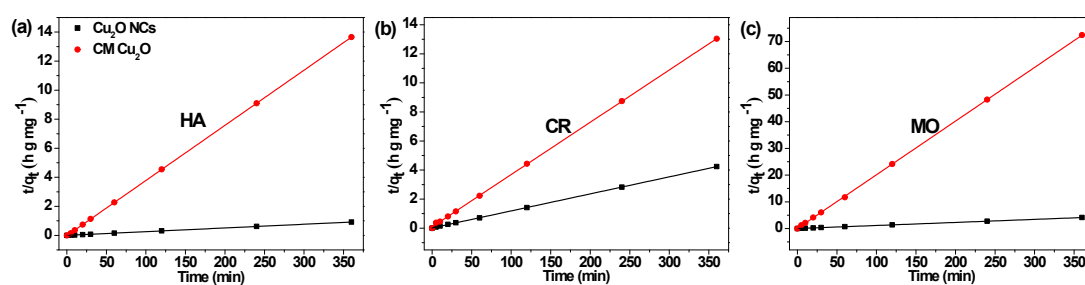

**Fig. S3.** Linear fit of experimental data obtained using pseudo-second-order kinetic model at different organic pollutants,  $\text{pH} = 5.0 \pm 0.1$ ,  $m/V = 0.1 \text{ g/L}$ .

**Table S1.** The experimental and calculated  $q_e$  values, pseudo-second-order rate constants,  $k_2$ , and correlation coefficient values,  $R_2$ .

|                       | Organic pollutants | Experimental values $q_e$ (mg/g) | Calculated $q_e$ (mg/g) | $k_2$ (g/(mg·min)) | $R^2$  |
|-----------------------|--------------------|----------------------------------|-------------------------|--------------------|--------|
| Cu <sub>2</sub> O NCs | HA                 | 345.22                           | 344.83                  | 0.00350            | 0.9997 |
|                       | CR                 | 84.88                            | 90.91                   | 0.00931            | 0.9998 |
|                       | MO                 | 87.53                            | 87.72                   | 0.00241            | 0.9999 |
| CM Cu <sub>2</sub> O  | HA                 | 26.37                            | 26.39                   | 0.0898             | 0.9999 |
|                       | CR                 | 27.61                            | 27.78                   | 0.01489            | 0.9994 |
|                       | MO                 | 4.97                             | 4.98                    | 1.13055            | 0.9996 |

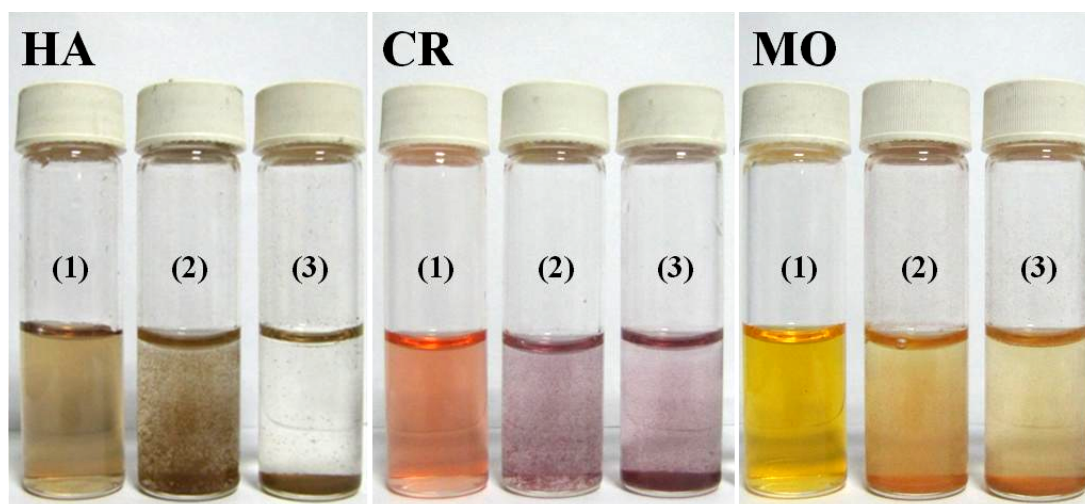

**Fig. S4.** Digital pictures of HA, CR and MO adsorption on as-prepared Cu<sub>2</sub>O NCs sample. NO. 1 vials are corresponded to HA, CR and MO solution, respectively. NO. 2 and 3 vials are taken at adsorption time of 10 minutes and 30 minutes, respectively.

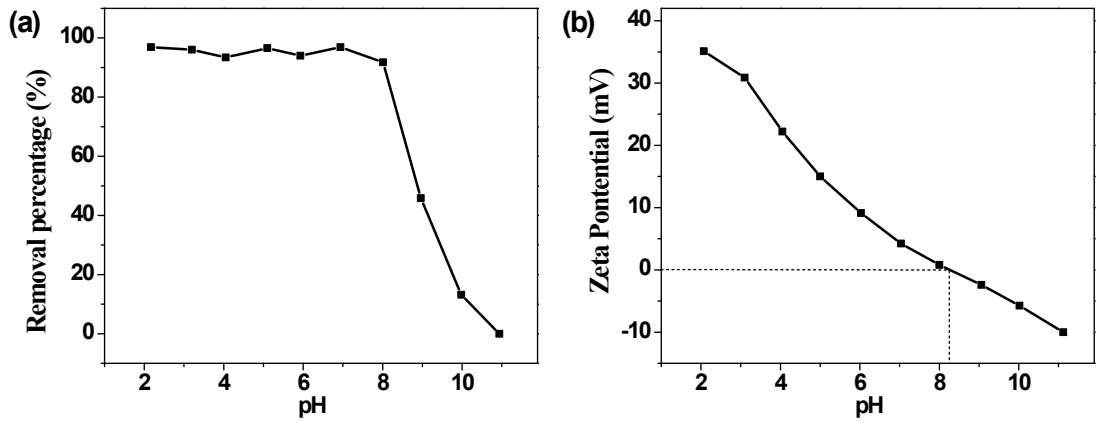

**Fig. S5.** (a) Effect of solution pH on the adsorption of HA by Cu<sub>2</sub>O NCs and (b) Zeta-potential of Cu<sub>2</sub>O NCs as a function of pH.

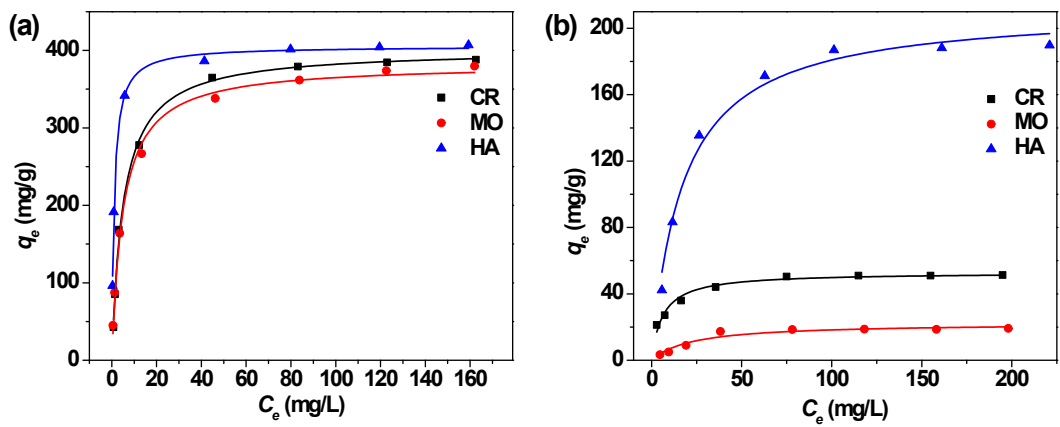

**Fig. S6.** Adsorption isotherms of CR, MO and HA on Cu<sub>2</sub>O NCs (a) and CM Cu<sub>2</sub>O (b).

**Table S2.** Parameters of the Langmuir and Freundlich isotherm model for organic pollutants on Cu<sub>2</sub>O NCs and CM Cu<sub>2</sub>O

| Samples               | Organic pollutants | Langmuir          |            |       | Freundlich |       |       |
|-----------------------|--------------------|-------------------|------------|-------|------------|-------|-------|
|                       |                    | $q_{\max}$ (mg/g) | $b$ (L/mg) | $R^2$ | $k$        | $n$   | $R^2$ |
| Cu <sub>2</sub> O NCs | HA                 | 405.5             | 0.935      | 0.992 | 199.86     | 6.449 | 0.814 |
|                       | CR                 | 401.4             | 0.203      | 0.996 | 116.12     | 3.883 | 0.878 |
|                       | MO                 | 382.9             | 0.198      | 0.995 | 113.15     | 3.926 | 0.921 |
| CM Cu <sub>2</sub> O  | HA                 | 212.3             | 0.0576     | 0.983 | 45.62      | 3.521 | 0.833 |
|                       | CR                 | 52.9              | 0.164      | 0.963 | 20.23      | 5.250 | 0.911 |
|                       | MO                 | 22.4              | 0.044      | 0.934 | 3.59       | 2.955 | 0.798 |

**Table S3.** Comparison of maximum adsorption capacity of organic pollutants adsorption on Cu<sub>2</sub>O NCs with other different adsorbents.

| <i>Adsorbents</i>                 | <i>Adsorption capacity (mg·g<sup>-1</sup>)</i> | <i>Ref.</i> |
|-----------------------------------|------------------------------------------------|-------------|
| <b>HA</b>                         |                                                |             |
| Activated carbon                  | 2.15                                           | 1           |
| Fly ash                           | 72                                             | 2           |
| Coal fly                          | 16.6                                           | 3           |
| Mesoporous silica                 | 120                                            | 4           |
| Aminopropyl functionalized SBA-15 | 117                                            | 5           |
| Cu <sub>2</sub> O NCs             | 405.5                                          | This study  |
| <b>CR</b>                         |                                                |             |
| Activated carbon                  | 52-189                                         | 6           |
| waste Fe(III)/Cr(III) hydroxide   | 44.00                                          | 7           |
| waste Orange peel                 | 22.44                                          | 8           |
| waste banana pith                 | 20.29                                          | 9           |
| Cu <sub>2</sub> O NCs             | 401.4                                          | This study  |
| <b>MO</b>                         |                                                |             |
| Activated carbon                  | 9.94                                           | 10          |
| Orange peels                      | 20.50                                          | 11          |
| Hyper-cross-linked polymer        | 70.92                                          | 12          |
| Cu <sub>2</sub> O NCs             | 382.9                                          | This study  |

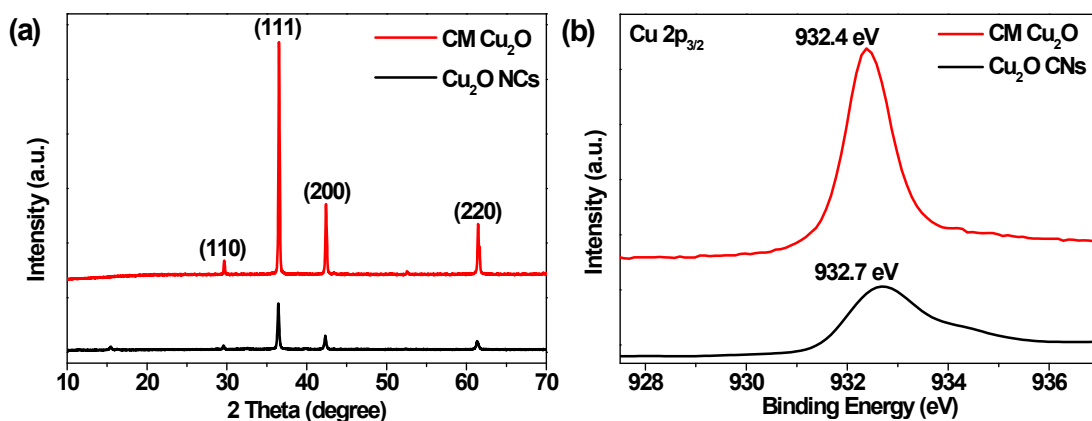

Fig. S7 XRD patterns (a) and Cu 2p<sub>3/2</sub> XPS spectra (b) of CM Cu<sub>2</sub>O and Cu<sub>2</sub>O NCs.

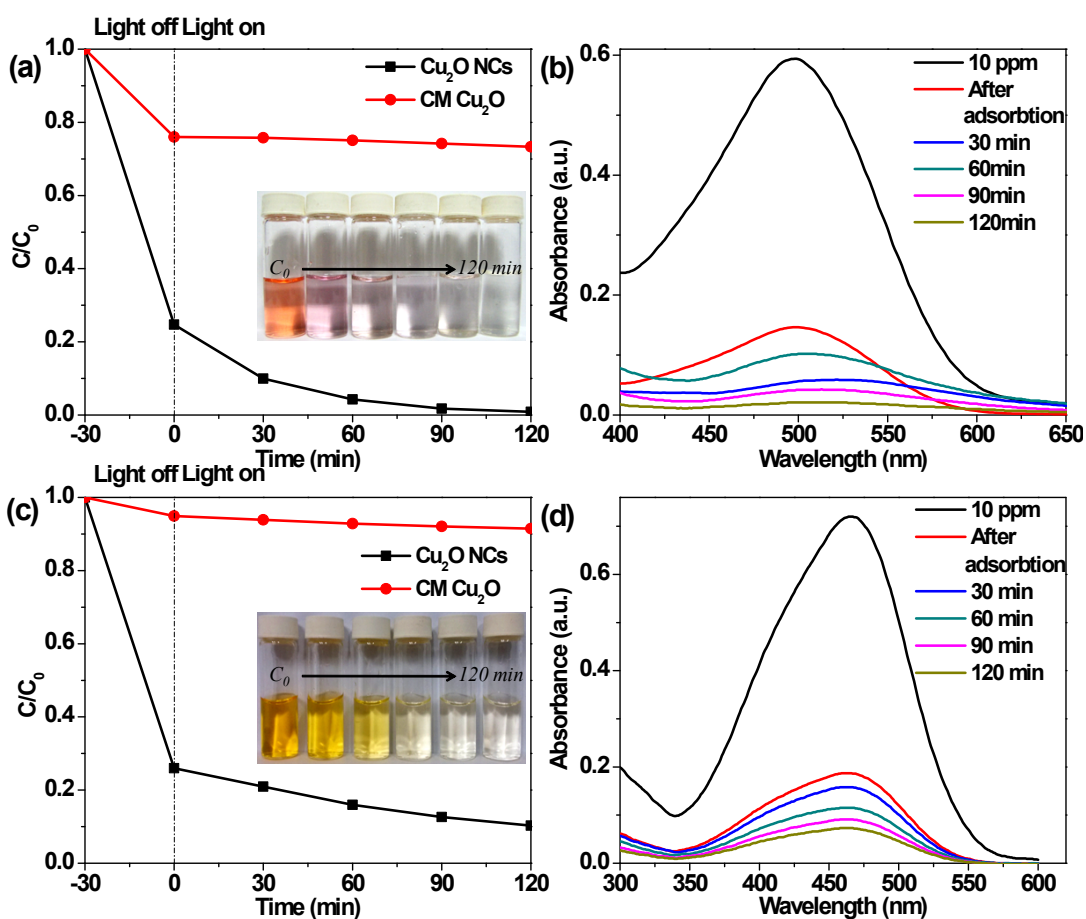

Fig. S8. Photodegradation of CR (a) and MO (c) over Cu<sub>2</sub>O NCs and CM Cu<sub>2</sub>O under visible light irradiation, respectively. UV-Vis spectra of CR (b) and MO (d) in aqueous Cu<sub>2</sub>O NCs dispersions as a function of irradiation time with visible light irradiation ( $\lambda \geq 400$  nm).

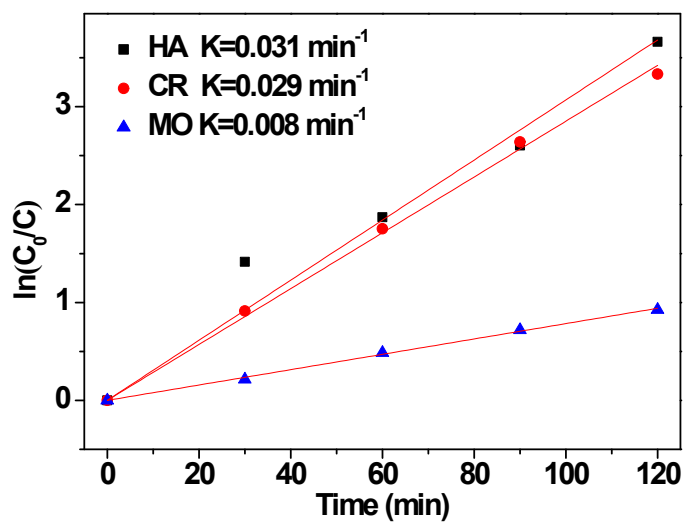

**Fig. S9.** Photocatalytic degradation reaction kinetics of HA, CR and MO over  $\text{Cu}_2\text{O}$  NCs, respectively.

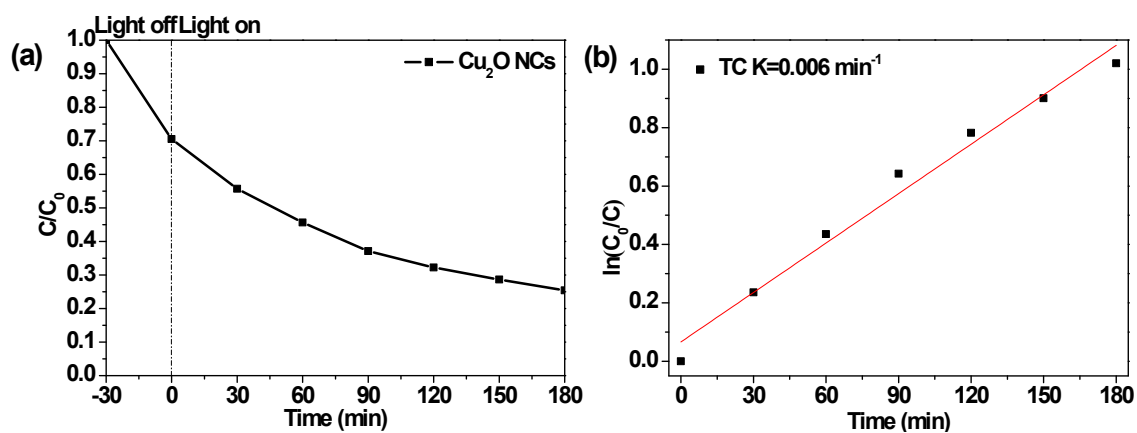

**Fig. S10.** Photodegradation (a) and photocatalytic degradation reaction kinetics (b) of TC over  $\text{Cu}_2\text{O}$  NCs under visible light irradiation.

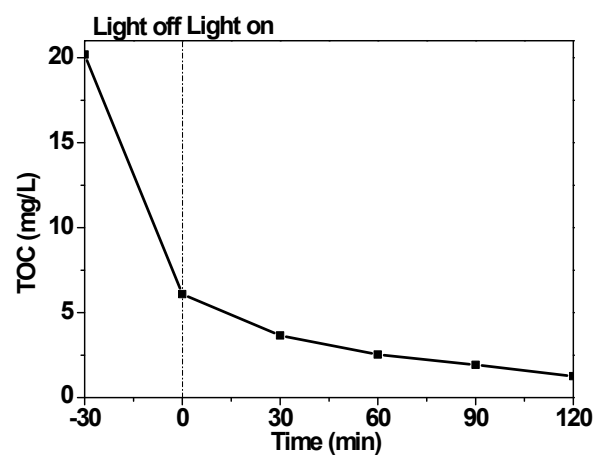

**Fig. S11** The TOC removal curve of HA photocatalytic degradation by  $\text{Cu}_2\text{O}$  NCs.

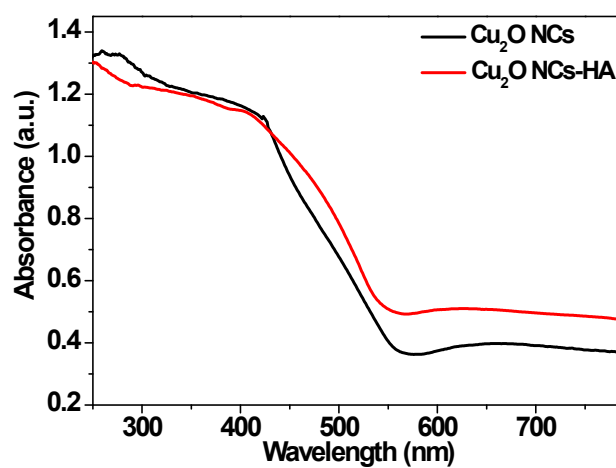

**Fig. S12** The UV-Vis diffuse reflectance spectra of  $\text{Cu}_2\text{O}$  NCs and after HA adsorption.



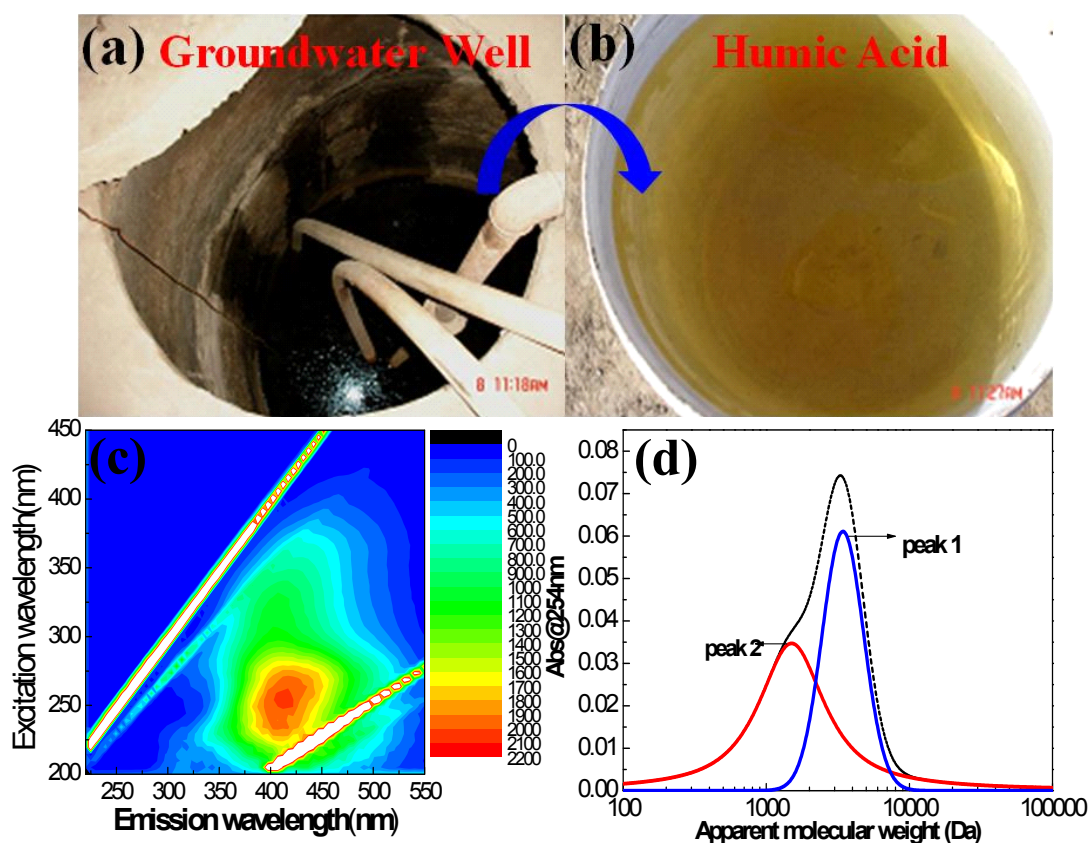

**Fig. S13.** (a) Digital pictures of the natural groundwater well; (b) the color of the groundwater sample; (c) the characterization of NOM by excitation emission matrix fluorescence spectroscopy and (d) by high performance size exclusion chromatography.

## References

- 1 J. P. Chen and S. Wu, *J. Colloid Inter. Sci.*, 2004, **280**, 334-342.
- 2 S. Wang and Z. H. Zhu, *J. Colloid Inter. Sci.*, 2007, **315**, 41-46.
- 3 S. Wang, Q. Ma and Z. H. Zhu, *Fuel*, 2008, **87**, 3469-3473.
- 4 F. Basarir, N. Cuong, W.K. Song and T.H. Yoon, *Macromol. Symp.*, 2007, **249**, 61-66.
- 5 Q. Tao, Z. Xu, J. Wang, F. Liu, H. Wan and S. Zheng, *Microporous Mesoporous Mater.*, 2010, **131**, 177-185.

- 6 E.L. Grabowska and G. Gryglewicz, *Dyes Pigments*, 2007, **74**, 34-40.
- 7 C. Namasivayam, R. Jeyakumar and R.T. Yamuna, *Waste Manage.*, 1994, **14**, 643-648.
- 8 C. Namasivayam, N. Muniasamy, K. Gayathri, M. Rani, K. Ranganathan, *Bioresour. Technol.*, 1996, **5**, 37-43.
- 9 C. Namasivayam and R.T. Yamuna, *J. Chem. Technol. Biotechnol.*, 1992, **53**, 153-157.
- 10 K. P. Singh, D. Mohan, S. Sinha, G. S. Tondon, D. Gosh, *Ind. Eng. Chem. Res.*, 2003, **42**, 1965-1976.
- 11 R. S. Juang, G. Annadurai, D. J. Lee, *J. Hazard. Mater.*, 2002, **92**, 263-274.
- 12 J. H. Huang, K. L. Huang, S. Q. Liu, A. T. Wang and C. Yan, *Colloids Surf. A*, 2008, **330**, 55-61.
